# Supplementary material for: Functional and Molecular Characterization of the Role of CTCF in Human Embryonic Stem Cell Biology
Source: PLoS One. 2012 Aug 3;7(8):e42424. doi: 10.1371/journal.pone.0042424 (PMC3411781; doi:10.1371/journal.pone.0042424)
Supplement: Table S2 — Antibodies used in this study, along with vendor name, catalog number and lot information (where available). (XLSX) [file pone.0042424.s011.xlsx]

## Sheet: Sheet1
Table S2
Antibody	vendor	catalog #	lot numbers used (where available)
α-CTCF (for western)	BD	612148	25747
α-CTCF (for ChIP and IP)	Millipore	07-729	DAM1745366 DAM1564576
α-Rad21	Abcam	AB992	GR12688-3
α-Nucleophosmin	Santa Cruz	SC53175	I1406
α-TopoIIB	Santa Cruz	SC13059	G0708
α-PAR	Milllipore	MAB33192	N91740944
α-Nanog	Abcam	ab21624	928843
α-Oct4	Santa Cruz	SC8628	10508
α-Sox2	Abcam	ab97959	GR25306-1
